# Supplementary material for: DISTMIX: direct imputation of summary statistics for unmeasured SNPs from mixed ethnicity cohorts
Source: PubMed Central journal article supplement (PMC4576696; doi:10.1093/bioinformatics/btv348), 2015-06-09
Supplement: supp_btv348_distmix_supplementary_data.pdf [file supp_btv348_distmix_supplementary_data.pdf]

## Supplementary Data

**Table S1.** 1000 Genome population abbreviations. AFR is an abbreviation for African; AMR for Admixed American; ASN for East Asian; EUR for European.

| Population Abbreviation | Number of Subjects | Super Population | Population Description                                            |
|-------------------------|--------------------|------------------|-------------------------------------------------------------------|
| ASW                     | 61                 | AFR              | African Ancestry in Southwest US                                  |
| CEU                     | 85                 | EUR              | Utah residents (CEPH) with Northern and Western European ancestry |
| CHB                     | 97                 | ASN              | Han Chinese in Beijing, China                                     |
| CHS                     | 100                | ASN              | Southern Han Chinese                                              |
| CLM                     | 60                 | AMR              | Colombian in Medellin, Colombia                                   |
| FIN                     | 93                 | EUR              | Finnish in Finland                                                |
| GBR                     | 89                 | EUR              | British in England and Scotland                                   |
| IBS                     | 14                 | EUR              | Iberian populations in Spain                                      |
| JPT                     | 89                 | ASN              | Japanese in Tokyo, Japan                                          |
| LWK                     | 97                 | AFR              | Luhya in Webuye, Kenya                                            |
| MXL                     | 66                 | AMR              | Mexican Ancestry from Los Angeles, USA                            |
| PUR                     | 55                 | AMR              | Puerto Rican in Puerto Rico                                       |
| TSI                     | 98                 | EUR              | Toscani in Italia                                                 |
| YRI                     | 88                 | AFR              | Yoruba in Ibadan, Nigeria                                         |

## 1. Simulating Illumina 1M GWAS summary statistics under the null hypothesis ( $H_0$ ) of no association

We simulated (under  $H_0$ ) 100 realistic GWAS summary data sets of Illumina 1M (<http://www.illumina.com>) autosomal SNPs for five combinations of ethnicities in the 1000 Genomes population: 1) 40% ASW + 60% GBR (Cohort 1), 2) 60% CHB + 40% MXL (Cohort 2), 3) 20% ASW + 30% CHB + 30% GBR + 20% MXL (Cohort 3), 4) 30% CEU + 25% CHS + 5% PUR + 40% YRI (Cohort 4) and 5) 10% ASW + 15% CEU + 15% CHB + 12.5% CHS + 15% GBR + 10% MXL + 2.5% PUR + 20% YRI (Cohort 5). For each of these data sets, we simulated the genotype data of 10,000 subjects by i) randomly drawing with replacement a subject's genotypes from each combination of ethnicities and ii) retaining as GWAS (measured) autosomal SNPs only those found on Illumina 1M chip. The phenotype of each subject was simulated as a random standard normal variable. The summary statistics were obtained by testing for association between the simulated SNP genotypes and phenotypes using linear regression.

**Table S2.** Command line options currently available in DISTMIX software.

| Option             | Short Flag | Parameter                                                        | Default     | Description                                                                                                          |
|--------------------|------------|------------------------------------------------------------------|-------------|----------------------------------------------------------------------------------------------------------------------|
| --version          | -v         | none                                                             | none        | Prints version information                                                                                           |
| --help             | -h         | none                                                             | none        | Outputs a full description of all DISTMIX options                                                                    |
| --reference        | -r         | filename                                                         | none        | The filename of the reference panel data                                                                             |
| --referenceIndex   | -i         | filename                                                         | none        | The filename of the reference panel index data                                                                       |
| --output           | -o         | filename                                                         | out.distmix | The output filename. This file has a header and is space-delimited. Rows correspond to SNPs and columns to variables |
| --chromosome       | -c         | positive integer between 1 and 22 or string such as "1p" or "2q" | none        | The chromosome number (or the chromosome number and arm, e.g., 1q, 22p)                                              |
| --windowSize       | -n         | decimal                                                          | 1.0         | The size of the DISTMIX prediction window* (Mb)                                                                      |
| --wingSize         | -m         | decimal                                                          | 0.5         | The size of the area (wing) flanking the left and right of the DISTMIX prediction window (Mb)                        |
| --populationWeight | -w         | filename                                                         | none        | The filename of the population weight data                                                                           |

\* DISTMIX imputes unmeasured SNP statistics within the prediction window based on measured SNP statistics within the extended window (i.e. the prediction window with flanking regions (wings) on both sides).

**Figure S1.** Manhattan plots of the  $-\log_{10}(p)$  for PGC SCZ2 discovery phase imputed by IMPUTE2/SHAPEIT (top) and DISTMIX (bottom). The horizontal line represents the genome wide significance threshold ( $p = 5 \times 10^{-8}$ ).

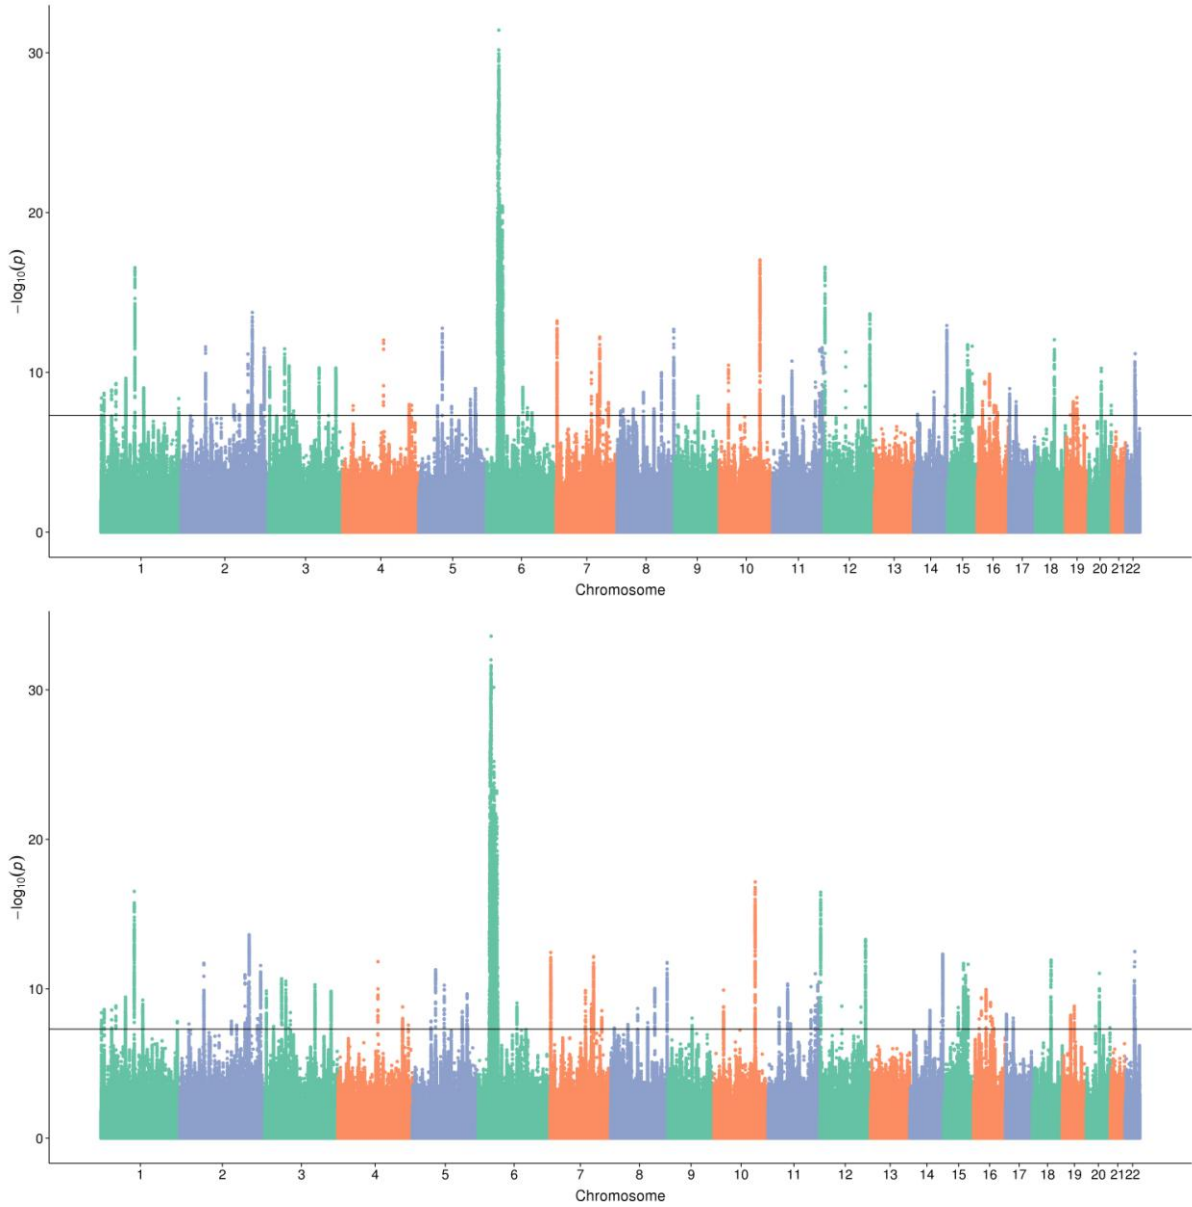

**Figure S2.** DIST Z-scores as a function of IMPUTE2 Z-scores from PGC2 SCZ discovery phase and DIST imputation information. EUR+ASN from 1KG was used as a reference panel. The vertical dotted lines represent the suggestive thresholds for PGC SCZ2 discovery phase ( IMPUTE2 p-value  $< 1 \times 10^{-6}$ ).  $r_s^2$ , the squared correlation coefficient ( $r^2$ ) between DIST and IMPUTE2 Z-scores for the suggestive PGC SCZ2 SNPs;  $r_a^2$ ,  $r^2$  between two predictions for all SNPs.

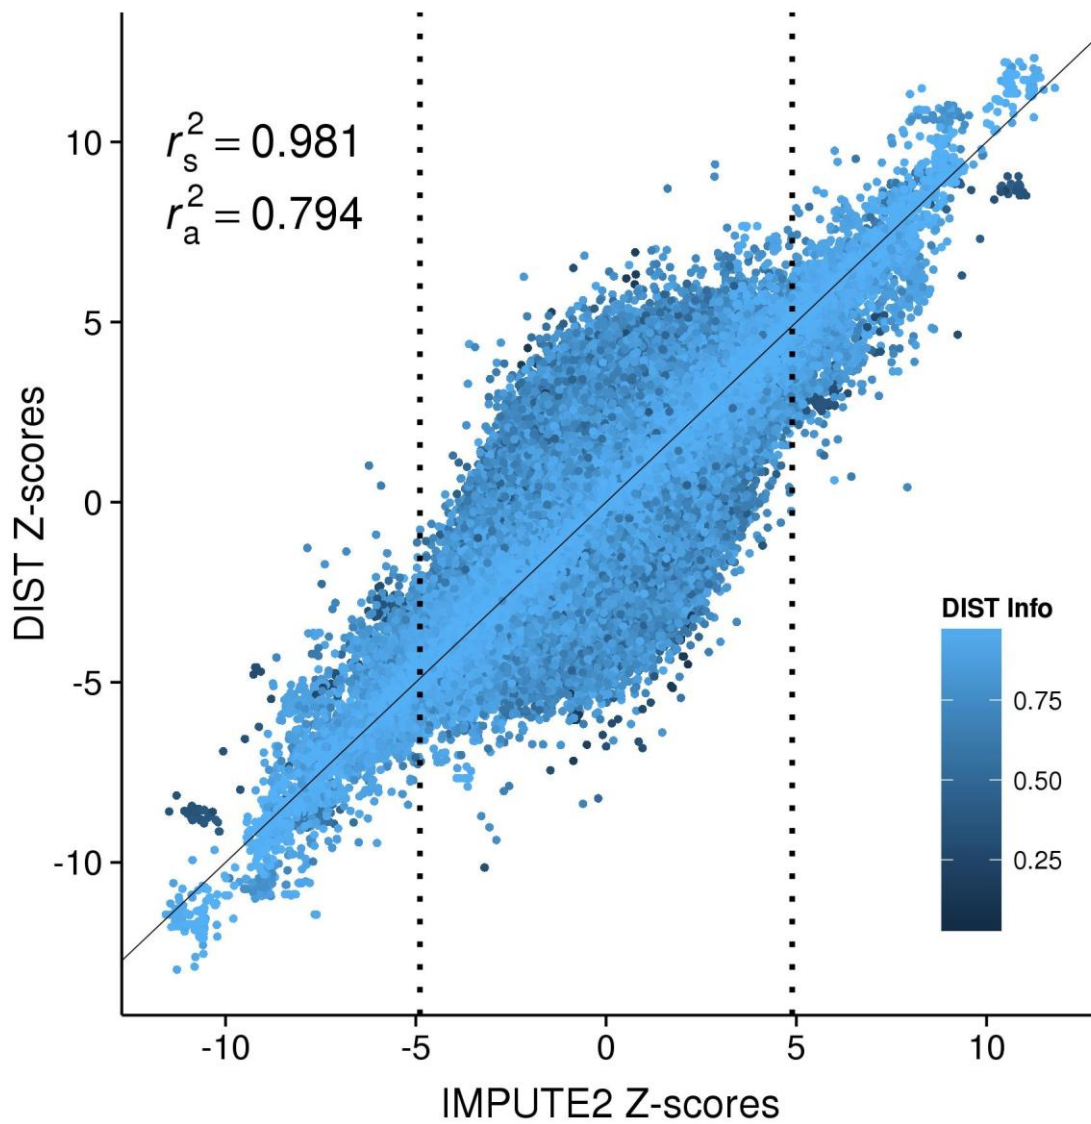

**Table S3.** Comparison of summary statistics of top discovery SNPs at the 105 significant autosomal association regions imputed by IMPUTE2 (obtained from PGC SCZ2 discovery phase) and imputed by DISTMIX using PGC SCZ2 1M data. In **bold** SNPs imputed by DISTMIX. Chr, chromosome number; Position, base pair position; A12, the SNP alleles having the first allele as the reference allele; P, p-value; Info, imputation information score; A1, the reference allele; A2, the alternative allele.

| IMPUTE2 (PGC SCZ2) |     |             |                  |     |          |       | DISTMIX    |          |                    |                    |            |             |                 |              |
|--------------------|-----|-------------|------------------|-----|----------|-------|------------|----------|--------------------|--------------------|------------|-------------|-----------------|--------------|
| Rank               | Chr | Position    | SNP ID           | A12 | P        | Info  | Rank       | Chr      | Position           | SNP ID             | A1         | A2          | P               | Info         |
| 59                 | 1   | 2,387,101   | rs4648845        | TC  | 4.03E-09 | 0.827 | 61         | 1        | 2,387,101          | rs4648845          | T          | C           | 4.03E-09        | 1            |
| 54                 | 1   | 8,424,984   | chr1_8424984_D   | I2D | 2.03E-09 | 0.989 | <b>55</b>  | <b>1</b> | <b>8,448,812</b>   | <b>rs3050831</b>   | <b>A</b>   | <b>AAT</b>  | <b>2.44E-09</b> | <b>0.937</b> |
| 48                 | 1   | 30,433,951  | rs1498232        | TC  | 1.28E-09 | 0.985 | 56         | 1        | 30,437,268         | rs6694545          | G          | A           | 2.64E-09        | 1            |
| 42                 | 1   | 44,100,084  | rs11210892       | AG  | 4.97E-10 | 0.997 | <b>46</b>  | <b>1</b> | <b>44,097,530</b>  | <b>rs2970610</b>   | <b>C</b>   | <b>T</b>    | <b>1.42E-09</b> | <b>0.974</b> |
| 39                 | 1   | 73,768,366  | rs12129573       | AC  | 2.35E-10 | 0.996 | 40         | 1        | 73,816,564         | rs1160682          | T          | C           | 3.62E-10        | 1            |
| 4                  | 1   | 98,501,984  | rs1702294        | TC  | 2.79E-17 | 1     | 3          | 1        | 98,502,340         | rs1782810          | A          | G           | 3.07E-17        | 1            |
| 45                 | 1   | 150,031,490 | rs140505938      | TC  | 9.34E-10 | 0.991 | <b>42</b>  | <b>1</b> | <b>150,110,056</b> | <b>rs56397877</b>  | <b>A</b>   | <b>G</b>    | <b>5.77E-10</b> | <b>0.733</b> |
| 97                 | 1   | 177,280,121 | rs6670165        | TC  | 1.16E-07 | 0.994 | 94         | 1        | 177,271,313        | rs16851037         | A          | G           | 2.28E-07        | 1            |
| 100                | 1   | 207,977,083 | rs7523273        | AG  | 1.61E-07 | 0.992 | 102        | 1        | 207,957,555        | rs7541230          | C          | T           | 1.31E-06        | 1            |
| 60                 | 1   | 243,555,105 | rs77149735       | AG  | 4.40E-09 | 0.607 | <b>72</b>  | <b>1</b> | <b>243,645,203</b> | <b>rs12751210</b>  | <b>G</b>   | <b>C</b>    | <b>1.58E-08</b> | <b>0.912</b> |
| 16                 | 2   | 57,987,593  | rs11682175       | TC  | 2.54E-12 | 0.991 | <b>15</b>  | <b>2</b> | <b>57,961,602</b>  | <b>rs13011472</b>  | <b>G</b>   | <b>C</b>    | <b>1.95E-12</b> | <b>0.953</b> |
| 99                 | 2   | 72,361,505  | rs3768644        | AG  | 1.30E-07 | 0.966 | <b>104</b> | <b>2</b> | <b>72,361,505</b>  | <b>rs3768644</b>   | <b>A</b>   | <b>G</b>    | <b>1.06E-05</b> | <b>0.866</b> |
| 67                 | 2   | 146,436,222 | chr2_146436222_I | I2D | 1.07E-08 | 0.978 | 71         | 2        | 146,425,531        | rs16825349         | G          | A           | 1.49E-08        | 1            |
| 81                 | 2   | 149,429,178 | chr2_149429178_D | I2D | 2.62E-08 | 0.94  | <b>103</b> | <b>2</b> | <b>149,462,958</b> | <b>rs145171722</b> | <b>A</b>   | <b>G</b>    | <b>6.24E-06</b> | <b>0.648</b> |
| 87                 | 2   | 162,845,855 | rs2909457        | AG  | 4.38E-08 | 1     | <b>77</b>  | <b>2</b> | <b>162,845,855</b> | <b>rs2909457</b>   | <b>A</b>   | <b>G</b>    | <b>2.73E-08</b> | <b>0.946</b> |
| 24                 | 2   | 185,601,420 | rs11693094       | TC  | 7.13E-12 | 0.977 | <b>23</b>  | <b>2</b> | <b>185,778,428</b> | <b>rs1344706</b>   | <b>C</b>   | <b>A</b>    | <b>1.29E-11</b> | <b>0.937</b> |
| 68                 | 2   | 193,848,340 | rs59979824       | AC  | 1.08E-08 | 0.929 | <b>67</b>  | <b>2</b> | <b>194,028,079</b> | <b>rs1882273</b>   | <b>C</b>   | <b>G</b>    | <b>9.37E-09</b> | <b>0.856</b> |
| 26                 | 2   | 198,304,577 | rs6434928        | AG  | 1.48E-11 | 0.955 | <b>28</b>  | <b>2</b> | <b>198,474,908</b> | <b>rs77368480</b>  | <b>T</b>   | <b>C</b>    | <b>4.17E-11</b> | <b>0.91</b>  |
| 84                 | 2   | 200,164,252 | rs6704641        | AG  | 3.40E-08 | 0.992 | <b>79</b>  | <b>2</b> | <b>200,221,052</b> | <b>rs66560483</b>  | <b>TA</b>  | <b>T</b>    | <b>4.20E-08</b> | <b>0.917</b> |
| 5                  | 2   | 200,825,237 | chr2_200825237_I | I2D | 1.78E-14 | 0.877 | <b>5</b>   | <b>2</b> | <b>200,715,388</b> | <b>rs2949006</b>   | <b>G</b>   | <b>T</b>    | <b>2.45E-14</b> | <b>0.943</b> |
| 69                 | 2   | 225,391,296 | rs11685299       | AC  | 1.11E-08 | 0.988 | <b>68</b>  | <b>2</b> | <b>225,395,641</b> | <b>rs200533090</b> | <b>A</b>   | <b>AAAC</b> | <b>9.88E-09</b> | <b>0.887</b> |
| 18                 | 2   | 233,592,501 | rs6704768        | AG  | 3.15E-12 | 0.995 | <b>18</b>  | <b>2</b> | <b>233,716,421</b> | <b>rs4973563</b>   | <b>T</b>   | <b>C</b>    | <b>2.78E-12</b> | <b>0.952</b> |
| 31                 | 3   | 2,547,786   | rs17194490       | TG  | 4.87E-11 | 0.973 | 37         | 3        | 2,537,916          | rs17194476         | T          | C           | 1.40E-10        | 1            |
| 90                 | 3   | 17,859,366  | rs4330281        | TC  | 5.51E-08 | 0.992 | <b>78</b>  | <b>3</b> | <b>17,859,855</b>  | <b>rs4908985</b>   | <b>C</b>   | <b>T</b>    | <b>3.30E-08</b> | <b>0.963</b> |
| 19                 | 3   | 36,858,583  | rs75968099       | TC  | 3.39E-12 | 0.98  | 24         | 3        | 36,862,980         | rs4624519          | T          | C           | 2.15E-11        | 1            |
| 30                 | 3   | 52,845,105  | rs2535627        | TC  | 3.96E-11 | 0.986 | <b>26</b>  | <b>3</b> | <b>52,845,105</b>  | <b>rs2535627</b>   | <b>C</b>   | <b>T</b>    | <b>3.10E-11</b> | <b>0.95</b>  |
| 80                 | 3   | 63,833,050  | rs832187         | TC  | 2.58E-08 | 0.985 | <b>60</b>  | <b>3</b> | <b>63,833,387</b>  | <b>rs34196118</b>  | <b>T</b>   | <b>TG</b>   | <b>3.93E-09</b> | <b>0.908</b> |
| 32                 | 3   | 136,288,405 | rs7432375        | AG  | 5.27E-11 | 0.988 | <b>30</b>  | <b>3</b> | <b>136,247,337</b> | .                  | <b>CCG</b> | <b>C</b>    | <b>5.45E-11</b> | <b>0.88</b>  |
| 33                 | 3   | 180,594,593 | chr3_180594593_I | I2D | 5.35E-11 | 0.921 | 38         | 3        | 180,615,583        | rs34133935         | C          | T           | 1.48E-10        | 1            |

|     |    |             |                  |     |          |       |     |    |             |             |    |              |          |       |
|-----|----|-------------|------------------|-----|----------|-------|-----|----|-------------|-------------|----|--------------|----------|-------|
| 72  | 4  | 23,423,603  | rs215411         | AT  | 1.22E-08 | 0.993 | 93  | 4  | 23,377,121  | rs215483    | A  | G            | 2.16E-07 | 0.874 |
| 13  | 4  | 103,146,890 | rs35518360       | AT  | 9.56E-13 | 0.922 | 12  | 4  | 103,188,709 | rs13107325  | T  | C            | 1.54E-12 | 1     |
| 66  | 4  | 170,626,552 | rs10520163       | TC  | 1.02E-08 | 0.995 | 49  | 4  | 170,550,327 | rs138997528 | T  | TCTGTATCTTGA | 1.64E-09 | 0.942 |
| 70  | 4  | 176,861,301 | rs1106568        | AG  | 1.15E-08 | 1     | 99  | 4  | 176,851,585 | .           | G  | GT           | 7.89E-07 | 0.481 |
| 73  | 5  | 45,364,875  | rs1501357        | TC  | 1.24E-08 | 0.98  | 70  | 5  | 45,301,035  | rs9292918   | G  | T            | 1.47E-08 | 1     |
| 9   | 5  | 60,598,543  | rs4391122        | AG  | 1.73E-13 | 0.983 | 19  | 5  | 60,586,625  | rs4352559   | C  | T            | 5.39E-12 | 1     |
| 74  | 5  | 88,746,331  | rs16867576       | AG  | 1.36E-08 | 0.944 | 86  | 5  | 88,744,550  | rs7701188   | A  | G            | 1.34E-07 | 0.831 |
| 95  | 5  | 109,036,066 | rs4388249        | TC  | 1.03E-07 | 0.992 | 83  | 5  | 109,190,934 | rs200733039 | T  | TTC          | 6.75E-08 | 0.911 |
| 61  | 5  | 137,851,192 | rs3849046        | TC  | 4.83E-09 | 0.993 | 58  | 5  | 137,841,064 | rs35191349  | G  | GCTC         | 3.32E-09 | 0.955 |
| 104 | 5  | 140,143,664 | chr5_140143664_I | I2D | 3.60E-07 | 1     | 97  | 5  | 140,136,468 | rs2563269   | T  | G            | 6.95E-07 | 0.96  |
| 49  | 5  | 152,177,121 | rs111294930      | AG  | 1.31E-09 | 0.821 | 39  | 5  | 152,589,220 | rs13168705  | G  | A            | 2.22E-10 | 0.828 |
| 85  | 5  | 153,680,747 | rs11740474       | AT  | 3.94E-08 | 0.97  | 90  | 5  | 153,687,040 | rs35495653  | T  | C            | 1.43E-07 | 0.96  |
| 1   | 6  | 28,712,247  | rs115329265      | AG  | 3.86E-32 | 0.833 | 1   | 6  | 28,689,672  | rs116594362 | A  | C            | 1.17E-30 | 1     |
| 92  | 6  | 73,155,701  | rs1339227        | TC  | 6.86E-08 | 0.982 | 85  | 6  | 73,161,604  | rs11968261  | T  | C            | 1.25E-07 | 0.935 |
| 44  | 6  | 84,280,274  | chr6_84280274_D  | I2D | 8.57E-10 | 0.924 | 44  | 6  | 84,373,058  | rs60730     | A  | G            | 8.99E-10 | 0.966 |
| 76  | 6  | 96,459,651  | rs117074560      | TC  | 1.66E-08 | 0.912 | 105 | 6  | 96,459,651  | rs117074560 | T  | C            | 3.52E-05 | 0.714 |
| 7   | 7  | 2,025,096   | chr7_2025096_I   | DI3 | 6.12E-14 | 0.998 | 8   | 7  | 2,017,445   | rs6461049   | T  | C            | 3.73E-13 | 1     |
| 103 | 7  | 24,747,494  | chr7_24747494_D  | DI3 | 3.59E-07 | 0.974 | 95  | 7  | 24,717,969  | rs79210963  | C  | T            | 2.76E-07 | 0.946 |
| 36  | 7  | 86,427,626  | rs12704290       | AG  | 1.04E-10 | 0.992 | 36  | 7  | 86,427,626  | rs12704290  | A  | G            | 1.32E-10 | 0.939 |
| 55  | 7  | 104,929,064 | rs6466055        | AC  | 2.46E-09 | 0.997 | 45  | 7  | 104,960,307 | rs6466058   | T  | C            | 1.10E-09 | 0.608 |
| 105 | 7  | 110,048,893 | rs211829         | TC  | 5.47E-07 | 0.998 | 98  | 7  | 110,074,276 | rs9656169   | T  | C            | 7.04E-07 | 1     |
| 11  | 7  | 110,898,915 | rs13240464       | TC  | 6.16E-13 | 0.994 | 10  | 7  | 110,921,315 | rs71544722  | G  | A            | 7.06E-13 | 0.808 |
| 79  | 7  | 131,567,263 | rs7801375        | AG  | 2.26E-08 | 0.991 | 87  | 7  | 131,567,263 | rs7801375   | G  | A            | 1.36E-07 | 0.95  |
| 65  | 7  | 137,074,844 | rs3735025        | TC  | 7.75E-09 | 0.997 | 57  | 7  | 137,039,670 | rs34093284  | GA | G            | 2.93E-09 | 0.842 |
| 82  | 8  | 4,180,844   | rs10503253       | AC  | 2.69E-08 | 1     | 80  | 8  | 4,184,179   | rs10046759  | G  | C            | 4.28E-08 | 0.956 |
| 78  | 8  | 27,442,127  | rs73229090       | AC  | 1.95E-08 | 0.942 | 76  | 8  | 27,424,696  | rs59724122  | T  | C            | 2.46E-08 | 0.942 |
| 52  | 8  | 60,700,469  | rs6984242        | AG  | 1.76E-09 | 1     | 54  | 8  | 60,694,647  | rs867743    | A  | G            | 2.11E-09 | 1     |
| 77  | 8  | 89,588,626  | rs7819570        | TG  | 1.90E-08 | 0.998 | 74  | 8  | 89,592,168  | rs36012446  | C  | T            | 1.88E-08 | 0.669 |
| 37  | 8  | 111,485,761 | rs36068923       | AG  | 1.05E-10 | 0.996 | 33  | 8  | 111,600,728 | rs6990323   | T  | G            | 9.46E-11 | 0.919 |
| 10  | 8  | 143,312,933 | rs4129585        | AC  | 2.03E-13 | 0.991 | 13  | 8  | 143,309,504 | rs10098073  | A  | C            | 1.74E-12 | 1     |
| 56  | 9  | 84,739,941  | rs11139497       | AT  | 3.09E-09 | 0.969 | 66  | 9  | 84,788,136  | rs2788116   | A  | C            | 9.33E-09 | 1     |
| 29  | 10 | 18,745,105  | rs7893279        | TG  | 3.56E-11 | 1     | 35  | 10 | 18,733,293  | rs4748466   | G  | A            | 1.23E-10 | 1     |
| 2   | 10 | 104,612,335 | rs11191419       | AT  | 9.24E-18 | 0.951 | 2   | 10 | 104,957,628 | rs200399577 | A  | AT           | 7.18E-18 | 0.716 |
| 57  | 11 | 24,403,620  | rs11027857       | AG  | 3.21E-09 | 0.996 | 53  | 11 | 24,404,054  | rs10834332  | G  | C            | 1.92E-09 | 0.969 |
| 27  | 11 | 46,350,213  | chr11_46350213_D | I2D | 1.97E-11 | 0.936 | 29  | 11 | 46,350,213  | rs61126341  | A  | AG           | 4.81E-11 | 0.914 |
| 91  | 11 | 57,510,294  | rs9420           | AG  | 6.65E-08 | 1     | 75  | 11 | 57,464,944  | rs200927786 | A  | AT           | 2.22E-08 | 0.884 |
| 101 | 11 | 109,378,071 | rs12421382       | TC  | 1.72E-07 | 0.99  | 96  | 11 | 109,389,471 | rs1808843   | C  | T            | 3.87E-07 | 0.955 |
| 41  | 11 | 113,392,994 | rs2514218        | TC  | 4.09E-10 | 0.99  | 32  | 11 | 113,407,114 | rs3133388   | A  | G            | 7.28E-11 | 0.848 |
| 53  | 11 | 123,394,636 | rs77502336       | CG  | 2.01E-09 | 0.968 | 64  | 11 | 123,394,636 | rs77502336  | C  | G            | 7.94E-09 | 0.938 |
| 21  | 11 | 124,613,957 | rs55661361       | AG  | 3.68E-12 | 0.985 | 21  | 11 | 124,612,932 | rs12293670  | G  | A            | 9.85E-12 | 0.944 |
| 17  | 11 | 130,718,630 | rs10791097       | TG  | 2.88E-12 | 0.995 | 31  | 11 | 130,717,256 | rs4366492   | C  | T            | 5.45E-11 | 0.961 |

|     |    |             |                  |     |          |       |     |    |             |             |   |       |          |       |
|-----|----|-------------|------------------|-----|----------|-------|-----|----|-------------|-------------|---|-------|----------|-------|
| 25  | 11 | 133,822,569 | rs75059851       | AG  | 1.23E-11 | 0.973 | 27  | 11 | 133,827,733 | rs3802924   | C | A     | 3.50E-11 | 1     |
| 3   | 12 | 2,344,960   | rs2007044        | AG  | 2.63E-17 | 0.992 | 4   | 12 | 2,344,960   | rs2007044   | G | A     | 3.49E-17 | 0.952 |
| 93  | 12 | 29,917,265  | rs679087         | AC  | 7.06E-08 | 0.975 | 88  | 12 | 29,928,388  | rs302321    | A | C     | 1.38E-07 | 1     |
| 22  | 12 | 57,622,371  | rs12826178       | TG  | 5.30E-12 | 0.741 | 48  | 12 | 57,569,478  | rs12814239  | T | C     | 1.48E-09 | 1     |
| 96  | 12 | 92,246,786  | rs4240748        | CG  | 1.03E-07 | 0.979 | 91  | 12 | 92,248,851  | rs7294593   | G | A     | 1.46E-07 | 1     |
| 94  | 12 | 103,596,455 | rs10860964       | TC  | 9.92E-08 | 1     | 92  | 12 | 103,581,985 | rs10860955  | G | A     | 1.66E-07 | 1     |
| 43  | 12 | 110,723,245 | rs4766428        | TC  | 7.09E-10 | 0.941 | 50  | 12 | 110,723,245 | rs4766428   | T | C     | 1.68E-09 | 0.917 |
| 6   | 12 | 123,665,113 | rs2851447        | CG  | 2.19E-14 | 0.994 | 6   | 12 | 123,682,081 | rs1716180   | A | G     | 5.04E-14 | 0.834 |
| 86  | 14 | 30,190,316  | rs2068012        | TC  | 4.14E-08 | 0.973 | 82  | 14 | 30,190,316  | rs2068012   | C | T     | 6.63E-08 | 0.853 |
| 51  | 14 | 72,417,326  | rs2332700        | CG  | 1.69E-09 | 0.981 | 59  | 14 | 72,418,321  | rs12891745  | T | C     | 3.61E-09 | 0.949 |
| 75  | 14 | 99,719,219  | rs2693698        | AG  | 1.38E-08 | 0.959 | 73  | 14 | 99,719,219  | rs2693698   | G | A     | 1.63E-08 | 0.899 |
| 8   | 14 | 104,046,834 | rs12887734       | TG  | 1.17E-13 | 0.966 | 9   | 14 | 104,053,764 | rs2403197   | T | C     | 4.84E-13 | 1     |
| 88  | 15 | 40,567,237  | rs56205728       | AG  | 4.92E-08 | 0.887 | 100 | 15 | 40,570,766  | rs143550864 | A | AAAAT | 8.48E-07 | 0.91  |
| 46  | 15 | 61,854,663  | rs12903146       | AG  | 1.04E-09 | 0.998 | 52  | 15 | 61,862,802  | rs8042151   | A | G     | 1.80E-09 | 1     |
| 89  | 15 | 70,589,272  | rs12148337       | TC  | 5.33E-08 | 0.999 | 84  | 15 | 70,576,138  | rs1971791   | A | G     | 8.52E-08 | 1     |
| 14  | 15 | 78,908,032  | rs8042374        | AG  | 1.87E-12 | 1     | 16  | 15 | 78,894,759  | rs3743078   | G | C     | 2.03E-12 | 1     |
| 35  | 15 | 84,706,461  | rs950169         | TC  | 7.62E-11 | 1     | 22  | 15 | 85,052,366  | rs141430008 | C | T     | 1.27E-11 | 0.662 |
| 15  | 15 | 91,426,560  | rs4702           | AG  | 2.30E-12 | 0.905 | 17  | 15 | 91,426,560  | rs4702      | A | G     | 2.30E-12 | 1     |
| 62  | 16 | 9,946,319   | rs9922678        | AG  | 6.72E-09 | 1     | 69  | 16 | 9,940,293   | rs9926303   | T | C     | 1.06E-08 | 1     |
| 40  | 16 | 13,749,859  | rs7405404        | TC  | 3.93E-10 | 0.997 | 41  | 16 | 13,753,384  | rs8055219   | A | G     | 4.01E-10 | 1     |
| 38  | 16 | 29,939,877  | rs12691307       | AG  | 1.30E-10 | 0.921 | 34  | 16 | 29,935,505  | rs11644809  | A | G     | 1.11E-10 | 0.825 |
| 71  | 16 | 58,681,393  | rs12325245       | AT  | 1.15E-08 | 0.953 | 43  | 16 | 58,681,704  | rs77101091  | A | C     | 8.29E-10 | 0.888 |
| 83  | 16 | 68,189,340  | rs8044995        | AG  | 3.27E-08 | 1     | 81  | 16 | 68,285,847  | rs1975802   | G | A     | 4.30E-08 | 0.955 |
| 47  | 17 | 2,208,899   | rs4523957        | TG  | 1.04E-09 | 0.956 | 62  | 17 | 2,161,908   | rs139504533 | G | GCAA  | 5.11E-09 | 0.971 |
| 63  | 17 | 17,958,402  | rs8082590        | AG  | 6.84E-09 | 0.954 | 65  | 17 | 17,956,459  | rs11658257  | C | G     | 9.16E-09 | 0.88  |
| 12  | 18 | 53,200,117  | rs9636107        | AG  | 9.09E-13 | 0.995 | 14  | 18 | 53,200,117  | rs9636107   | G | A     | 1.77E-12 | 0.944 |
| 20  | 18 | 53,533,189  | rs72934570       | TC  | 3.67E-12 | 0.981 | 11  | 18 | 53,572,922  | rs72936305  | C | A     | 1.20E-12 | 0.859 |
| 64  | 19 | 19,478,022  | rs2905426        | TG  | 6.92E-09 | 0.935 | 63  | 19 | 19,657,632  | rs7245983   | C | A     | 5.86E-09 | 0.963 |
| 58  | 19 | 30,987,423  | rs2053079        | AG  | 3.79E-09 | 0.987 | 47  | 19 | 31,038,995  | rs1469705   | C | T     | 1.47E-09 | 0.914 |
| 102 | 19 | 50,091,199  | rs56873913       | TG  | 2.19E-07 | 0.944 | 101 | 19 | 50,091,464  | rs10406941  | C | A     | 1.27E-06 | 0.984 |
| 34  | 20 | 37,453,194  | rs6065094        | AG  | 5.52E-11 | 1     | 20  | 20 | 37,453,194  | rs6065094   | G | A     | 9.28E-12 | 0.963 |
| 98  | 20 | 48,131,036  | rs7267348        | TC  | 1.18E-07 | 0.993 | 89  | 20 | 48,130,628  | rs6019879   | C | T     | 1.39E-07 | 1     |
| 28  | 22 | 39,987,017  | chr22_39987017_D | I2D | 2.20E-11 | 0.956 | 25  | 22 | 40,000,313  | rs5995756   | C | T     | 2.84E-11 | 1     |
| 23  | 22 | 41,587,556  | rs9607782        | AT  | 6.76E-12 | 0.944 | 7   | 22 | 41,587,556  | rs9607782   | A | T     | 3.25E-13 | 0.893 |
| 50  | 22 | 42,603,814  | rs6002655        | TC  | 1.48E-09 | 0.948 | 51  | 22 | 42,571,028  | rs760648    | A | G     | 1.77E-09 | 0.836 |
